# Supplementary material for: Population-based validation of a German version of the Brief Resilience Scale
Source: PubMed Central journal article supplement (PMC5811014; doi:10.1371/journal.pone.0192761), 2018-02-13
Supplement: pone.0192761.s001.pdf [file pone.0192761.s001.pdf]

**S1 File. German version of the Brief Resilience Scale.**

Geben Sie bitte an, wie sehr Sie den folgenden Aussagen jeweils zustimmen

|                                                                                          | Stimme überhaupt nicht zu | Stimme eher nicht zu     | Neutral                  | Stimme eher zu           | Stimme vollkommen zu     |
|------------------------------------------------------------------------------------------|---------------------------|--------------------------|--------------------------|--------------------------|--------------------------|
| 1. Ich neige dazu, mich nach schwierigen Zeiten schnell zu erholen.                      | <input type="checkbox"/>  | <input type="checkbox"/> | <input type="checkbox"/> | <input type="checkbox"/> | <input type="checkbox"/> |
| 2. Es fällt mir, schwer stressige Situationen durchzustehen.                             | <input type="checkbox"/>  | <input type="checkbox"/> | <input type="checkbox"/> | <input type="checkbox"/> | <input type="checkbox"/> |
| 3. Ich brauche nicht viel Zeit, um mich von einem stressigen Ereignis zu erholen.        | <input type="checkbox"/>  | <input type="checkbox"/> | <input type="checkbox"/> | <input type="checkbox"/> | <input type="checkbox"/> |
| 4. Es fällt mir schwer zur Normalität zurückzukehren, wenn etwas Schlimmes passiert ist. | <input type="checkbox"/>  | <input type="checkbox"/> | <input type="checkbox"/> | <input type="checkbox"/> | <input type="checkbox"/> |
| 5. Normalerweise überstehe ich schwierige Zeiten ohne größere Probleme.                  | <input type="checkbox"/>  | <input type="checkbox"/> | <input type="checkbox"/> | <input type="checkbox"/> | <input type="checkbox"/> |
| 6. Ich brauche tendenziell lange, um über Rückschläge in meinem Leben hinwegzukommen.    | <input type="checkbox"/>  | <input type="checkbox"/> | <input type="checkbox"/> | <input type="checkbox"/> | <input type="checkbox"/> |
